# Supplementary material
Source: Springer Nature journal article supplement (https://www.springermedizin.de/resource/supplementary/13058_2011_2975_MOESM4_ESM.pdf/9702996)

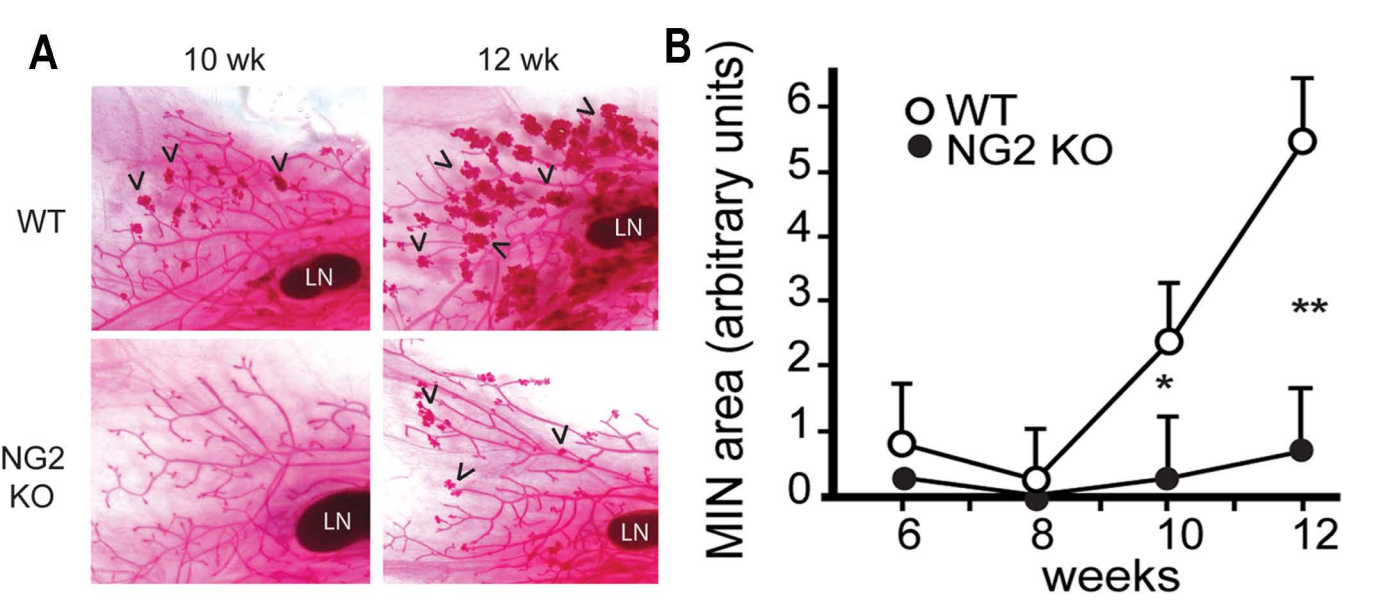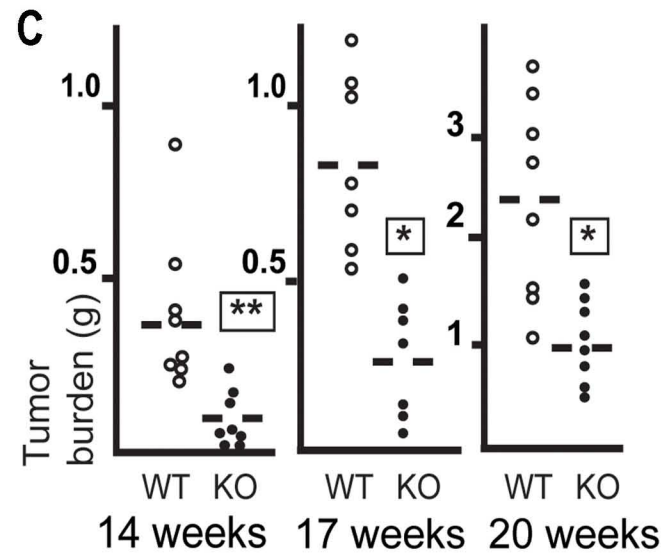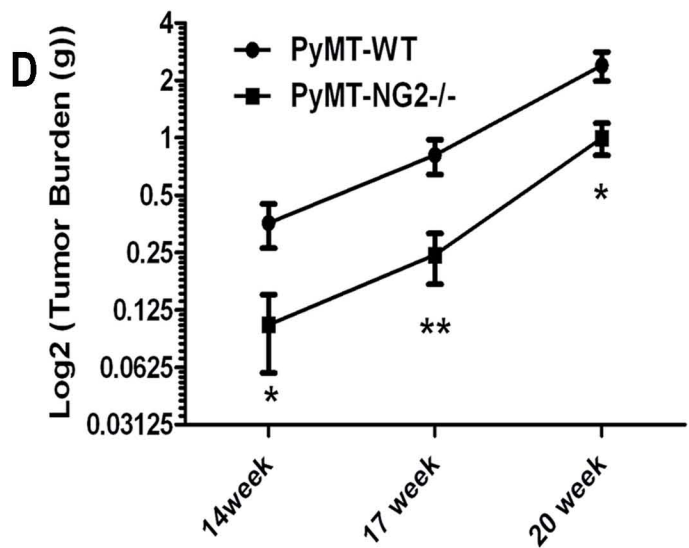

17 Weeks

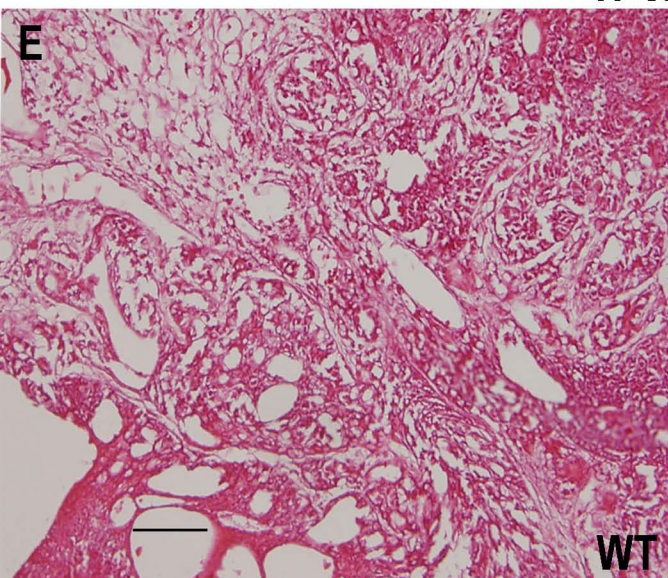

10 Weeks

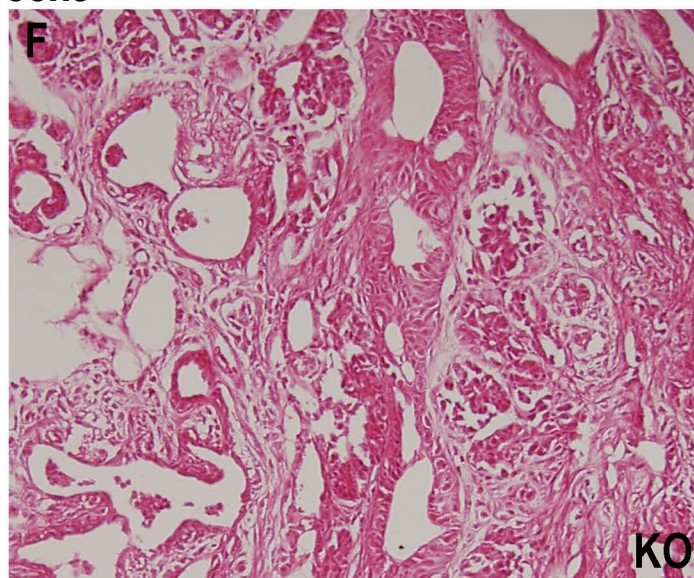

12 Weeks

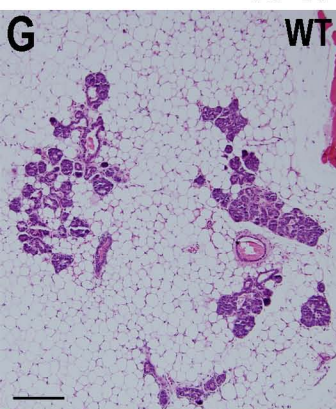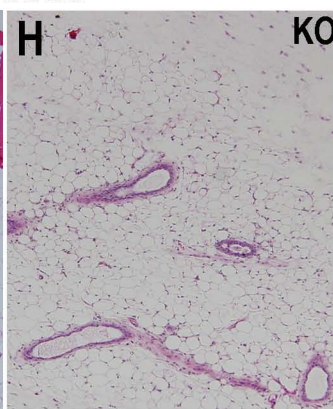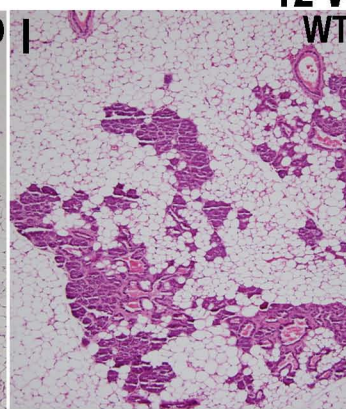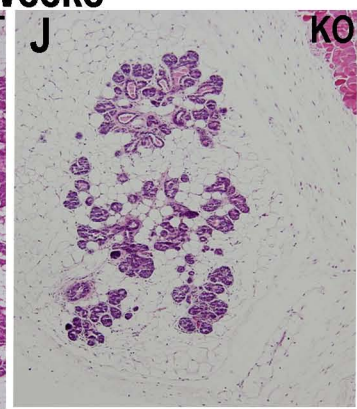

Supplement: MOESM4 [file 9702996]
